# Supplementary material for: Brassica napus BnaC9.DEWAX1 Negatively Regulates Wax Biosynthesis via Transcriptional Suppression of BnCER1-2
Source: MDPI journal article supplement (doi:10.3390/ijms24054287), 2023-02-21
Supplement: s1 [file s1]

**Figure S1** Interaction analysis of *BnCER1-2* promoter with BnaC9.DEWAX1 protein by yeast one-hybrid assay. (A) Nucleotide sequence of promoter region of *BnCER1-2* gene used in yeast one-hybrid assay, which is 100 bp upstream of the start codon of the *BnCER1-2* gene. Nucleotide in red indicated GCC-like motif. (B) Co-transfection verification for *BnCER1-2* promoter interaction with BnaC9.DEWAX1 protein. The prey and bait constructs were co-transformed to Y1H gold yeast competent cell. The prey construct contains the BnaC9.DEWAX1 gene driven by the CaMV 35S promoter. The bait construct consists of the AUR1-C antibiotic resistance gene driven by the *BnCER1-2* promoter linked with the yeast iso-1-cytochrome C minimal promoter.

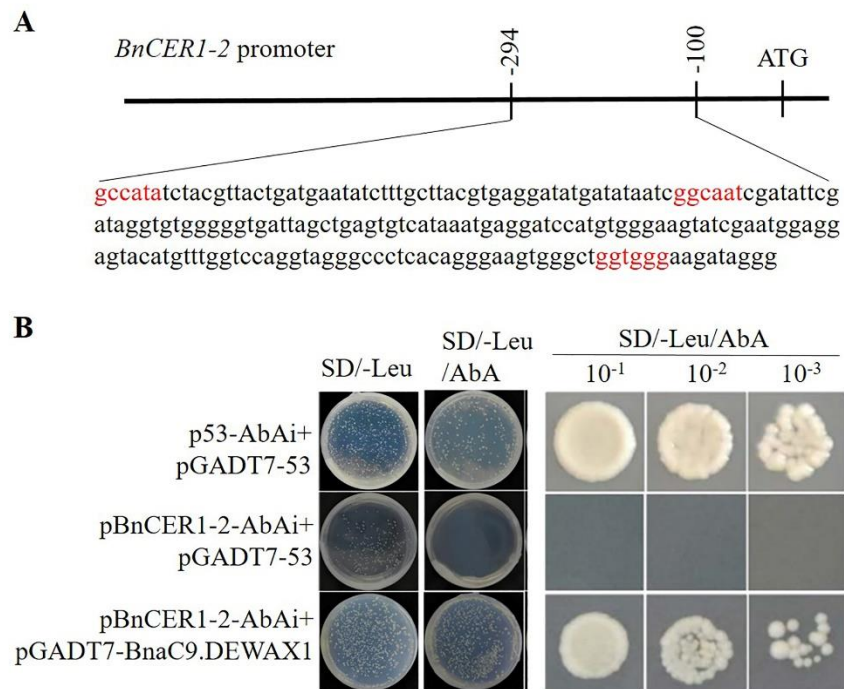

**Figure S2** Nucleotide and amino acid sequences (A) and phylogenetic analysis (B) of BnaC9.DEWAX1. (A) The AP2/ERF DNA-binding domain is underlined, the putative nuclear localization signal (NLS) are double underlined, and the putative acidic domain is marked with dots below. (B) A phylogenetic tree constructed using BnaC9.DEWAX1 and other Arabidopsis ERF subfamily members (B-1~B-6). BnaC9.DEWAX1, indicated by the asterisk, was grouped with members of the ERF subfamily B-3, and sub-grouped with Arabidopsis DEWAX.

**A**

```

ATGACAACCTTTTGGAGAAAAGCTCTGATGTGGAGGTTATACACAAGTATCTCTTTGAGGAC 60
M T T F E K S S D V E V I H K Y L F E D 20
TTGATGATCCCTGATTGCTTCATGGAAGATTTTGTCTTTGATGATGCTGCTTTTGTCTCA 120
L M I P D C F M E D F V F D D A A F V S 40
GGACTCTTGTCTCTAGAACCCTTTAACCAGTTTCCTAAACAAGAGCCTAGTTCACCGGTT 180
G L L S L E P F N P V P K Q E P S S P V 60
CTTGATCCAGATTCTGTGTCCAAGAGTTTCTACAAATTGAAGCAGAATCATCATCATCG 240
L D P D S C V Q E F L Q I E A E S S S S 80
TCAACAACCTACAACATCACCTGAGGCTGAGACAGTCTCAAACCGAAAAAGACCAAGGAGG 300
S T T T T S P E A E T V S N R K R P R R 100
GTCGAAGAGACGAGACACTACAGAGGCGTGAGAAGGAGACCATGGGGGAAATTTGCAGCA 360
V E E T R H Y R G V R R R P W G K F A A 120
GAGATTCGAGATCCGGCCAAGAAAGGATCTAGGATGTGGCTAGGCACATTGAGACTGAT 420
E I R D P A K K G S R M W L G T F E T D 140
ATTGATGCTGCAAGAGCTTATGACTACACAGCTTTTAAGCTCAGGGGAAGAAAAGCTGTG 480
I D A A R A Y D Y T A F K L R G R K A V 160
CTCAACTTTCTTTGGATGCTGGTAAGTATGATGCTCCGATCAATTCTTGCCGGAAGAGG 540
L N F P L D A G K Y D A P I N S C R K R 180
AGAAGAAACGATGTACCGGAGCCTCAAGGAATAACTACTAGTACTACATCATCTTCATCA 600
R R N D V P E P Q G I T T S T T S S S S 200
AACTAA 606
N * 201

```

**B**

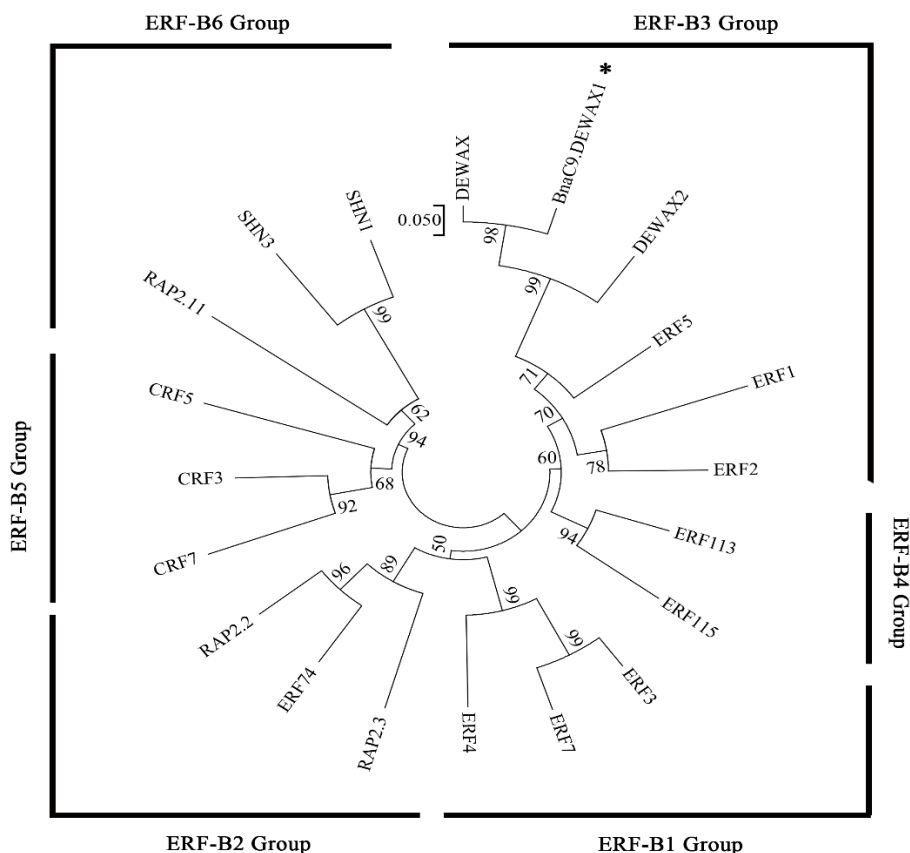

**Table S1** Nucleotide sequence in *BnCER1-2* and *CER1* promoter regions regulated by BnaC9.DEWAX1.

| Genes           | Position ( relative to ATG) | Nucleotide sequences of promoter regions (5'-3')                                                                                                                                                                                    |
|-----------------|-----------------------------|-------------------------------------------------------------------------------------------------------------------------------------------------------------------------------------------------------------------------------------|
| <i>BnCER1-2</i> | -294 ~ -100                 | <b>gccata</b> tctacgttactgatgaatatctttgcttacgtgaggatatgatataatc <b>ggcaat</b> cgatattcgat<br>aggtgtgggggtgattagctgagtgataaatgaggatccatgtgggaagtatcgaatggaggagt<br>acatgtttggtccaggtaggggccctcacagggaagtgggct <b>ggtggg</b> aagatagg |
| <i>CER1</i>     | -317 ~ -153                 | gaagccatccatcaacc <b>ggtgca</b> tttcctcaa <b>ggcatg</b> gatgatgatcagaacatcgatga <b>ggtgg</b><br><b>g</b> agggggaattagctgagtgataaatgaggatccatgtggagatcatcgaatggtagtagtacat<br>gtttggtcttagct <b>ggcccc</b> accacaag                  |

Red indicated GCC-like motif.

**Table S2** Primers used in this study.

| Name                                                             | Sequence (5'-3')                                              |                |
|------------------------------------------------------------------|---------------------------------------------------------------|----------------|
| <b>For qRT-PCR</b>                                               |                                                               |                |
| BnDEWAX1-Fq                                                      | GTTCTTGATCCAGATTCCTGT                                         |                |
| BnDEWAX1-Rq                                                      | GTGATGTTGTAGTTGTTGACG                                         |                |
| BnACT7-Fq                                                        | GTGACAATGGAAGTGAATGGTGA                                       |                |
| BnACT7-Rq                                                        | GTGCCTAGGACGACCAACAATACTC                                     |                |
| CER1-Fq                                                          | AGGTCGACAGGGAGACCAAC                                          |                |
| CER1-Rq                                                          | ATAAGCGCTGCCATCAACAC                                          |                |
| AtEF1a-qF                                                        | TCGTTATGATCGACTCTCTTATGG                                      |                |
| AtEF1-qR                                                         | CCAAAAAGGAGGGAGAGAGAAAG                                       |                |
| <b>For subcellular localization</b>                              |                                                               |                |
| BnDEWAX1-Fs                                                      | <u>GGAATTC</u> ATGACAACCTTTTGAGAAAAGCTCTG                     | <i>EcoRI</i>   |
| BnDEWAX1-Rs                                                      | CG <u>GATCC</u> TTAGTTTGATGAAGATGATGTAGTA                     | <i>BamHI</i>   |
| <b>For overexpression/complementation transgenic arabidopsis</b> |                                                               |                |
| BnDEWAX1-Fo                                                      | CATTTGGAGAGGACACTAGT <u>GATCC</u> ATGACAACCTTTTGAGAAAAGCTCTG  | <i>BamHI</i>   |
| BnDEWAX1-Ro                                                      | GCAGGGTCGACGGTATCGATA <u>AAGCTT</u> TTAGTTTGATGAAGATGATGTAGTA | <i>HindIII</i> |
| Hpt-F                                                            | CTGAACTCACCGCGACGTCTGTC                                       |                |
| Hpt-R                                                            | GCCTCCGCTCGAAGTAGCGC                                          |                |
| <b>Yeast one-hybrid assays</b>                                   |                                                               |                |
| BnDEWAX1-Fy                                                      | CG <u>GATCC</u> ATGACAACCTTTTGAGAAAAGCTCTG                    | <i>BamHI</i>   |
| BnDEWAX1-Ry                                                      | CCG <u>CTCGAGT</u> TAGTTTGATGAAGATGATGTAGTACTAGTAG            | <i>XhoI</i>    |
| BnCER1-2P-Fy                                                     | CCC <u>AAGCTT</u> GCCATATCTACGTTACTGATGAATATC                 | <i>HindIII</i> |
| BnCER1-2P-Ry                                                     | CCG <u>CTCGAGC</u> CCCTATCTTCCCACCAGCC                        | <i>XhoI</i>    |
| <b>For transcriptional activity assay</b>                        |                                                               |                |
| BnDEWAX1-Fra                                                     | CCGTCTAGAACTAGT <u>GATCC</u> ATGACAACCTTTTGAGAAAAGCTCTG       | <i>BamHI</i>   |
| BnDEWAX1-Rra                                                     | TTTGCGGAGTACCCG <u>GATCC</u> TTAGTTTGATGAAGATGATGTAGTA        | <i>KpnI</i>    |
| <b>For Transient dual-LUC assay</b>                              |                                                               |                |
| BnDEWAX1-Ftr                                                     | <u>GGAATTC</u> ATGACAACCTTTTGAGAAAAGCTCTG                     | <i>EcoRI</i>   |
| BnDEWAX1-Rtr                                                     | CCG <u>CTCGAGT</u> TAGTTTGATGAAGATGATGTAGTACTAGTAG            | <i>XhoI</i>    |
| BnCER1-2P-Ftr                                                    | GTCGACGGTATCGATA <u>AAGCTT</u> GCCATATCTACGTTACTGATGAATATC    | <i>HindIII</i> |
| BnCER1-2P-Rtr                                                    | AGAACTAGTGGATCCCCG <u>GATCC</u> CCCTATCTTCCCACCAGCC           | <i>SmaI</i>    |
| <b>For prokaryotic expression</b>                                |                                                               |                |
| BnDEWAX1-Fgex                                                    | CCGCGTGATCCCCG <u>GATCC</u> ATGACAACCTTTTGAGAAAAGCTCTG        | <i>EcoRI</i>   |
| BnDEWAX1-Rgex                                                    | GTCACGATGCGGCCG <u>CTCGAGC</u> TACTGAGGAGGATTCATCTCCGGT       | <i>XhoI</i>    |

The underlined indicates the site of restriction enzyme.
